# Supplementary material for: Hyperglycemia-Induced Platelet Activation in Type 2 Diabetes Is Resistant to Aspirin but Not to a Nitric Oxide–Donating Agent
Source: PubMed Central journal article supplement — Diabetes Care. 2010 Mar 18;33(6):1262–8. doi: 10.2337/dc09-2013 (PMC2875435; doi:10.2337/dc09-2013), 2010-03-18

**Figure 1 (On-Line).**

A) Arachidonic acid–induced platelet aggregation before and after the hyperglycemic clamp. Platelet aggregation was induced with increasing concentrations of arachidonic acid (0.3, 0.4 and 1 mM).

B) Collagen (1µg/mL) – induced platelet aggregation, before (pre) and after (past) the hyperglycaemic clamp.

\*p<0.05 vs Placebo; § p< 0.05 vs Aspirin.

**Figure 1 (on line)**

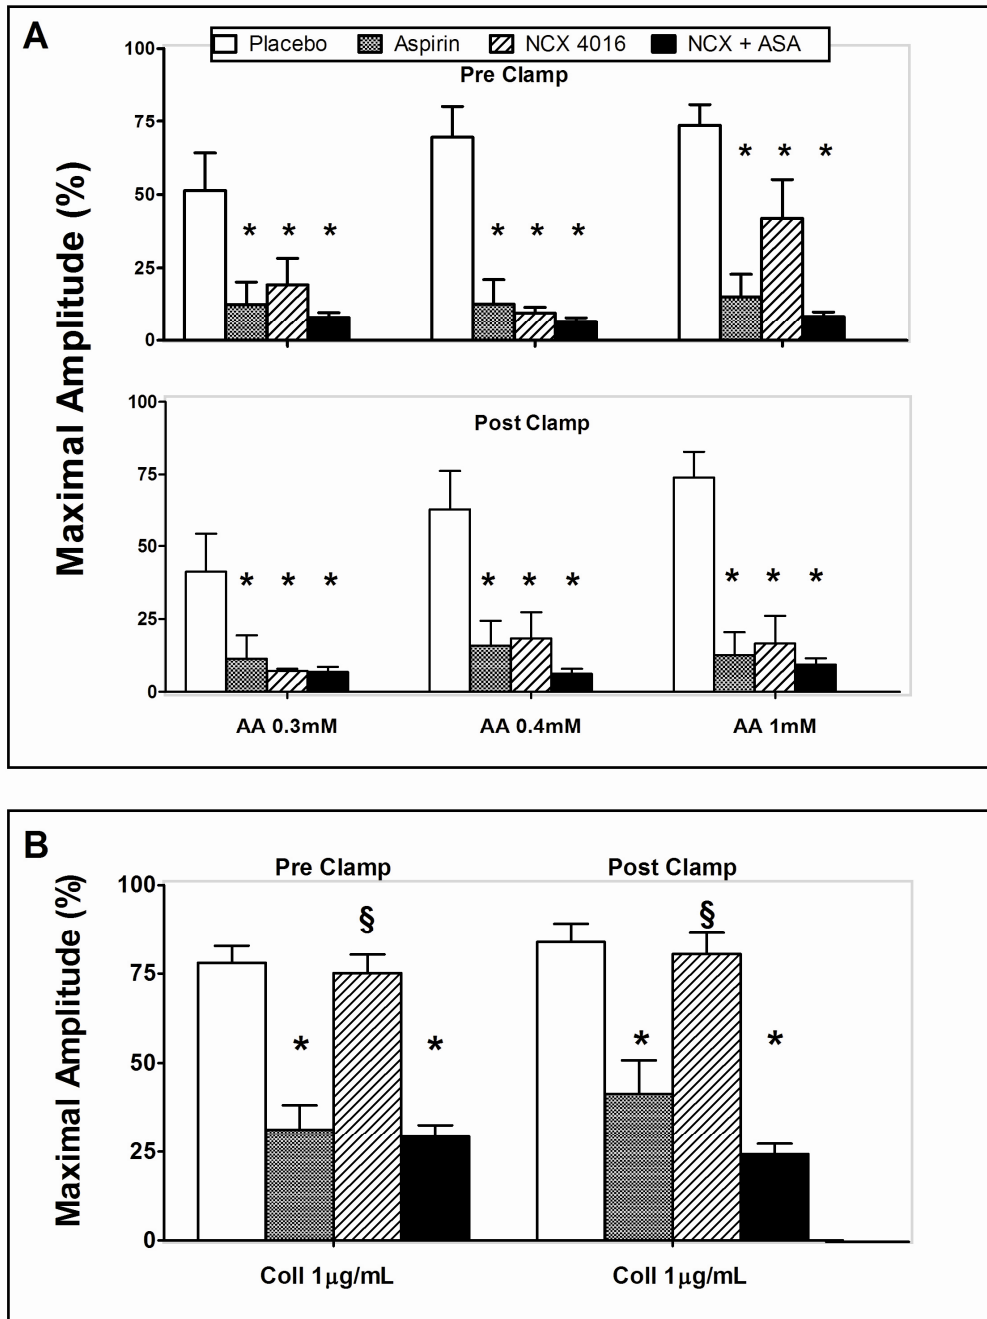

Supplement: supp_dc09-2013_onlineappendix.pdf [file supp_dc09-2013_onlineappendix.pdf]
